# Supplementary material for: Nε-Formylation of lysine is a widespread post-translational modification of nuclear proteins occurring at residues involved in regulation of chromatin function
Source: PubMed Central journal article supplement — Nucleic Acids Res. 2007 Dec 1;36(2):570–7. doi: 10.1093/nar/gkm1057 (PMC2241850; doi:10.1093/nar/gkm1057), 2007-12-01
Supplement: nar_gkm1057_1.pdf [file nar_gkm1057_1.pdf]

| Protein     | Peptide                  | Theoretical Mass | Measured Mass | Mass Difference | Mscot Score | Extraction method | Source         |
|-------------|--------------------------|------------------|---------------|-----------------|-------------|-------------------|----------------|
| Calgizzarin | Ac-AfKISSPTETER          | 1287.630646      | 1287.629964   | -0.000682       | 31          | PCA               | MCF-7          |
| Calgizzarin | Ac-AfKISSPTETER          | 1287.630646      | 1287.630258   | -0.000388       | 36          | PCA               | MCF-7          |
| Calgizzarin | NQfKDPGVLDR              | 1168.583618      | 1168.583304   | -0.000314       | 35          | PCA               | MCF-7          |
| Calgizzarin | NQfKDPGVLDR              | 1168.583618      | 1168.582826   | -0.000792       | 26          | PCA               | MCF-7          |
| Calgizzarin | YAGfKDGNYNTLSK           | 1506.69902       | 1506.697074   | -0.001946       | 63          | PCA               | MCF-7          |
| Calgizzarin | YAGfKDGNYNTLSK           | 1506.69902       | 1506.6976     | -0.001420       | 65          | PCA               | MCF-7          |
| H1.2        | Ac-SETAPAAPAAAPPAEfKAPVK | 1942.999954      | 1942.997612   | -0.002342       | 18          | PCA               | MCF-7          |
| H1.2        | Ac-SETAPAAPAAAPPAEfKAPVK | 1942.999954      | 1942.999992   | 0.000038        | 30          | PCA               | MCF-7          |
| H1.2        | fKPAAATVTK               | 913.523254       | 913.522928    | -0.000326       | 38          | PCA               | MCF-7          |
| H1.2        | fKPAAATVTK               | 913.523254       | 913.523258    | 0.000004        | 52          | PCA               | MCF-7          |
| H1.2-4      | ASGPPVSELITfKAVAASK      | 1752.962097      | 1752.961562   | -0.000535       | 78          | PCA               | Colon cancer   |
| H1.2-4      | ASGPPVSELITfKAVAASK      | 1752.962097      | 1752.961152   | -0.000945       | 63          | PCA               | Mamma Cancer   |
| H1.2-4      | ASGPPVSELITfKAVAASK      | 1752.962097      | 1752.963048   | 0.000951        | 85          | PCA               | MCF-7          |
| H1.2-4      | fKASGPPVSELITK           | 1353.750336      | 1353.74892    | -0.001416       | 49          | PCA               | MCF-7          |
| H1.2-4      | fKASGPPVSELITK           | 1353.750336      | 1353.750236   | -0.000100       | 56          | PCA               | MCF-7          |
| H1.2-4      | fKASGPPVSELITK           | 1353.750336      | 1353.74687    | -0.003466       | 101         | PCA               | MCF-7          |
| H1.2-4      | GTLVQTfKGTGASGSFK        | 1565.804871      | 1565.806308   | 0.001437        | 28          | PCA               | MCF-7          |
| H1.2-4      | GTLVQTfKGTGASGSFK        | 1565.804871      | 1565.806714   | 0.001843        | 22          | PCA               | MCF-7          |
| H1.2-4      | GTLVQTfKGTGASGSFK        | 1565.804871      | 1565.803384   | -0.001487       | 97          | PCA               | MCF-7          |
| H1.2-4      | LGLfKSLVSK               | 971.601486       | 971.600756    | -0.000730       | 56          | PCA               | Colon cancer   |
| H1.2-4      | LGLfKSLVSK               | 971.601486       | 971.600892    | -0.000594       | 67          | PCA               | Mamma Cancer   |
| H1.2-4      | LGLfKSLVSK               | 971.601486       | 971.601354    | -0.000132       | 54          | PCA               | MCF-7          |
| H1.2-4      | LGLfKSLVSK               | 971.601486       | 971.600766    | -0.000720       | 61          | PCA               | Ovarian Cancer |
| H1.2-4      | LGLfKSLVSK               | 971.601486       | 971.600192    | -0.001294       | 47          | PCA               | MCF-7          |
| H1.2-4      | SGVSLAALfKK              | 1000.591644      | 1000.592858   | 0.001214        | 37          | PCA               | MCF-7          |
| H1.2-4      | SGVSLAALfKK              | 1000.591644      | 1000.591966   | 0.000322        | 43          | PCA               | MCF-7          |
| H1.2-4      | SGVSLAALfKK              | 1000.591644      | 1000.589066   | -0.002578       | 39          | PCA               | MCF-7          |
| H1.2-4      | SLVSfKGTLVQTK            | 1287.739777      | 1287.73779    | -0.001987       | 53          | PCA               | MCF-7          |
| H1.2-4      | SLVSfKGTLVQTK            | 1287.739777      | 1287.738964   | -0.000813       | 59          | PCA               | MCF-7          |
| H1.2-5      | fKALAAAGYDVEK            | 1262.650604      | 1262.65111    | 0.000506        | 55          | PCA               | MCF-7          |
| H1.2-5      | fKALAAAGYDVEK            | 1262.650604      | 1262.650504   | -0.000100       | 41          | PCA               | MCF-7          |
| H1.2-5      | fKALAAAGGYDVEK           | 1248.634949      | 1248.634528   | -0.000421       | 43          | PCA               | MCF-7          |
| H1.2-5      | fKALAAAGGYDVEK           | 1248.634949      | 1248.634729   | -0.000220       | 43          | PCA               | MCF-7          |
| H1.3        | fKVAGAATPK               | 869.497025       | 869.496114    | -0.000911       | 35          | PCA               | MCF-7          |
| H1.3        | fKVAGAATPK               | 869.497025       | 869.494299    | -0.002726       | 25          | PCA               | MCF-7          |

|      |                          |             |             |           |    |               |                    |
|------|--------------------------|-------------|-------------|-----------|----|---------------|--------------------|
| H1.4 | Ac-SETAPAAPAAPAPAEfKTPVK | 1973.010529 | 1973.008898 | -0.001631 | 25 | PCA           | MCF-7              |
| H1.4 | Ac-SETAPAAPAAPAPAEfKTPVK | 1973.010529 | 1973.011916 | 0.001387  | 15 | PCA           | MCF-7              |
| H1.4 | Ac-SETAPAAPAAPAPAEfKTPVK | 1973.010529 | 1973.012044 | 0.001515  | 33 | Salt          | Mouse liver nuclei |
| H1.4 | Ac-SETAPAAPAAPAPAEfKTPVK | 1973.010529 | 1973.015212 | 0.004683  | 35 | Salt          | Mouse liver nuclei |
| H1.4 | ALAAAGYDVEfK             | 1134.555649 | 1134.557116 | 0.001467  | 49 | Salt          | Mouse liver nuclei |
| H1.4 | ALAAAGYDVEfK             | 1134.555649 | 1134.557216 | 0.001567  | 49 | Salt          | Mouse liver nuclei |
| H1.4 | ERSGVSLAALfK             | 1157.640381 | 1157.639412 | -0.000969 | 28 | PCA           | Colon cancer       |
| H1.4 | ERSGVSLAALfK             | 1157.640381 | 1157.639494 | -0.000887 | 45 | PCA           | Mamma Cancer       |
| H1.4 | ERSGVSLAALfK             | 1157.640381 | 1157.639656 | -0.000725 | 20 | PCA           | Ovarian Cancer     |
| H1.4 | fKAASGEAKPK              | 1013.550507 | 1013.54981  | -0.000697 | 33 | Salt          | Mouse liver nuclei |
| H1.4 | fKAASGEAKPK              | 1013.550507 | 1013.55279  | 0.002283  | 33 | Salt          | Mouse liver nuclei |
| H1.4 | fKATGAATPK               | 871.476303  | 871.478046  | 0.001743  | 15 | PCA           | MCF-7              |
| H1.4 | fKATGAATPK               | 871.476303  | 871.475212  | -0.001091 | 37 | Salt          | Mouse liver nuclei |
| H1.4 | fKPAAAAGAK               | 811.455154  | 811.453078  | -0.002076 | 40 | Salt          | Mouse liver nuclei |
| H1.4 | fKPAAAAGAK               | 811.455154  | 811.453211  | -0.001943 | 40 | Salt          | Mouse liver nuclei |
| H1.5 | fKATGPPVSELITK           | 1367.765991 | 1367.765004 | -0.000987 | 44 | PCA           | MCF-7              |
| H1.5 | fKATGPPVSELITK           | 1367.765991 | 1367.765111 | -0.000880 | 44 | PCA           | MCF-7              |
| H2A  | fKGNYAER                 | 864.408936  | 864.406768  | -0.002168 | 47 | Salt          | Mouse liver nuclei |
| H2A  | fKGNYAER                 | 864.408936  | 864.408562  | -0.000374 | 38 | Sulfuric Acid | MCF-7              |
| H2A  | NDEELNfKLLGK             | 1299.666992 | 1299.665796 | -0.001196 | 60 | Salt          | Mouse liver nuclei |
| H2A  | NDEELNfKLLGK             | 1299.666992 | 1299.666598 | -0.000394 | 61 | Sulfuric Acid | A543               |
| H2A  | NDEELNfKLLGK             | 1299.666992 | 1299.661298 | -0.005694 | 67 | Sulfuric Acid | A543               |
| H2A  | NDEELNfKLLGK             | 1299.666992 | 1299.667198 | 0.000206  | 58 | Sulfuric Acid | HeLa               |
| H2A  | NDEELNfKLLGK             | 1299.666992 | 1299.666637 | -0.000622 | 59 | Sulfuric Acid | HeLa               |
| H2A  | NDEELNfKLLGK             | 1299.666992 | 1299.667056 | 0.000064  | 81 | Sulfuric Acid | MCF-7              |
| H2A  | VTIAQGGVLPNIQAVLLPfKK    | 2086.251328 | 2086.251298 | -0.000030 | 34 | Sulfuric Acid | A543               |
| H2A  | VTIAQGGVLPNIQAVLLPfKK    | 2086.251328 | 2086.254222 | 0.002894  | 31 | Sulfuric Acid | A543               |
| H2A  | VTIAQGGVLPNIQAVLLPfKK    | 2086.251328 | 2086.246281 | -0.005047 | 42 | Sulfuric Acid | HeLa               |
| H2A  | VTIAQGGVLPNIQAVLLPfKK    | 2086.251328 | 2086.251522 | 0.000194  | 70 | Sulfuric Acid | HeLa               |
| H2A  | VTIAQGGVLPNIQAVLLPfKK    | 2086.251328 | 2086.25154  | 0.000212  | 48 | Sulfuric Acid | MCF-7              |
| H2A  | VTIAQGGVLPNIQAVLLPfKK    | 2086.251328 | 2086.249848 | -0.001480 | 42 | Sulfuric Acid | MCF-7              |
| H2B  | ESYSVYVYfKVLK            | 1504.781281 | 1504.782818 | 0.001537  | 56 | Salt          | Mouse liver nuclei |
| H2B  | ESYSVYVYfKVLK            | 1504.781281 | 1504.78222  | 0.000939  | 79 | Sulfuric Acid | HeLa               |
| H2B  | fKESYSVYVYK              | 1292.628815 | 1292.628274 | -0.000541 | 55 | Salt          | Mouse liver nuclei |
| H2B  | fKESYSVYVYK              | 1292.628815 | 1292.625052 | -0.003763 | 53 | Sulfuric Acid | A543               |
| H2B  | fKESYSVYVYK              | 1292.628815 | 1292.62803  | -0.000785 | 25 | Sulfuric Acid | A543               |
| H2B  | fKESYSVYVYK              | 1292.628815 | 1292.62932  | 0.000505  | 16 | Sulfuric Acid | HeLa               |

|     |                    |             |             |           |    |               |                    |
|-----|--------------------|-------------|-------------|-----------|----|---------------|--------------------|
| H2B | fKESYSVYVYK        | 1292.628815 | 1292.626112 | -0.002703 | 40 | Sulfuric Acid | HeLa               |
| H2B | fKESYSVYVYK        | 1292.628815 | 1292.628324 | -0.000491 | 65 | Sulfuric Acid | HeLa               |
| H2B | fKESYSVYVYK        | 1292.628815 | 1292.628014 | -0.000801 | 22 | Sulfuric Acid | MCF-7              |
| H2B | fKESYSVYVYK        | 1292.628815 | 1292.625542 | -0.003273 | 57 | Sulfuric Acid | MCF-7              |
| H2B | HAVSEGTfKAVTK      | 1254.656769 | 1254.656486 | -0.000283 | 94 | Sulfuric Acid | HeLa               |
| H2B | HAVSEGTfKAVTK      | 1254.656769 | 1254.656329 | -0.000440 | 94 | Sulfuric Acid | HeLa               |
| H2B | LLLPGELAfK         | 980.590591  | 980.588586  | -0.002005 | 41 | Salt          | Mouse liver nuclei |
| H2B | LLLPGELAfK         | 980.590591  | 980.590536  | -0.000055 | 30 | Salt          | Mouse liver nuclei |
| H2B | LLLPGELAfK         | 980.590591  | 980.588484  | -0.002107 | 30 | Sulfuric Acid | A543               |
| H2B | LLLPGELAfK         | 980.590591  | 980.591114  | 0.000523  | 34 | Sulfuric Acid | HeLa               |
| H2B | LLLPGELAfK         | 980.590591  | 980.587828  | -0.002763 | 36 | Sulfuric Acid | HeLa               |
| H2B | LLLPGELAfK         | 980.590591  | 980.586588  | -0.004003 | 34 | Sulfuric Acid | MCF-7              |
| H2B | LLLPGELAfK         | 980.590591  | 980.58668   | -0.003911 | 33 | Sulfuric Acid | MCF-7              |
| H2B | LLLPGELAfKHAVSEGTK | 1789.993729 | 1789.990503 | -0.003226 | 74 | Sulfuric Acid | HeLa               |
| H2B | PEPAfKSAPAPK       | 1119.592392 | 1119.590514 | -0.001878 | 30 | Salt          | Mouse liver nuclei |
| H2B | PEPAfKSAPAPK       | 1119.592392 | 1119.590798 | -0.001594 | 34 | Salt          | Mouse liver nuclei |
| H2B | PEPAfKSAPAPK       | 1119.592392 | 1119.59257  | 0.000178  | 63 | Sulfuric Acid | HeLa               |
| H2B | VLfKQVHPDTGISSK    | 1535.830719 | 1535.826558 | -0.004161 | 18 | Sulfuric Acid | HeLa               |
| H2B | VLfKQVHPDTGISSK    | 1535.830719 | 1535.834876 | 0.004157  | 73 | Sulfuric Acid | HeLa               |
| H3  | EIAQDFfKTDLR       | 1362.677917 | 1362.676252 | -0.001665 | 54 | Salt          | Mouse liver nuclei |
| H3  | EIAQDFfKTDLR       | 1362.677917 | 1362.677274 | -0.000643 | 52 | Sulfuric Acid | A543               |
| H3  | EIAQDFfKTDLR       | 1362.677917 | 1362.67382  | -0.004097 | 44 | Sulfuric Acid | A543               |
| H3  | EIAQDFfKTDLR       | 1362.677917 | 1362.679754 | 0.001837  | 51 | Sulfuric Acid | HeLa               |
| H3  | EIAQDFfKTDLR       | 1362.677917 | 1362.67703  | -0.000887 | 46 | Sulfuric Acid | HeLa               |
| H3  | EIAQDFfKTDLR       | 1362.677917 | 1362.677114 | -0.000803 | 54 | Sulfuric Acid | HeLa               |
| H3  | EIAQDFfKTDLR       | 1362.677917 | 1362.677092 | -0.000825 | 37 | Sulfuric Acid | MCF-7              |
| H3  | EIAQDFfKTDLR       | 1362.677917 | 1362.674922 | -0.002995 | 35 | Sulfuric Acid | MCF-7              |
| H3  | fKLPFQR            | 815.465347  | 815.467348  | 0.002001  | 21 | Sulfuric Acid | A543               |
| H3  | fKLPFQR            | 815.465347  | 815.465856  | 0.000509  | 19 | Sulfuric Acid | A543               |
| H3  | fKLPFQR            | 815.465347  | 815.46646   | 0.001113  | 18 | Sulfuric Acid | HeLa               |
| H3  | fKLPFQR            | 815.465347  | 815.466068  | 0.000721  | 20 | Sulfuric Acid | HeLa               |
| H3  | fKLPFQR            | 815.465347  | 815.464214  | -0.001133 | 24 | Sulfuric Acid | HeLa               |
| H3  | fKLPFQR            | 815.465347  | 815.467182  | 0.001835  | 25 | Sulfuric Acid | MCF-7              |
| H3  | fQLATaKAAR         | 1055.608719 | 1055.608422 | -0.000297 | 43 | Salt          | Mouse liver nuclei |
| H3  | fQLATaKAAR         | 1055.608719 | 1055.609166 | 0.000447  | 36 | Sulfuric Acid | A543               |
| H3  | fQLATaKAAR         | 1055.608719 | 1055.607902 | -0.000817 | 34 | Sulfuric Acid | A543               |
| H3  | fQLATaKAAR         | 1055.608719 | 1055.609832 | 0.001113  | 41 | Sulfuric Acid | HeLa               |

|    |                   |             |             |           |    |               |                    |
|----|-------------------|-------------|-------------|-----------|----|---------------|--------------------|
| H3 | fKQLATaKAAR       | 1055.608719 | 1055.60896  | 0.000241  | 31 | Sulfuric Acid | HeLa               |
| H3 | fKQLATaKAAR       | 1055.608719 | 1055.609768 | 0.001049  | 38 | Sulfuric Acid | MCF-7              |
| H3 | fKQLATaKAAR       | 1055.608719 | 1055.606662 | -0.002057 | 36 | Sulfuric Acid | MCF-7              |
| H3 | fKQLATK           | 715.422821  | 715.422478  | -0.000343 | 27 | Salt          | Mouse liver nuclei |
| H3 | LLLPGELAfK        | 980.590591  | 980.587724  | -0.002867 | 46 | Sulfuric Acid | A543               |
| H3 | LLLPGELAfK        | 980.590591  | 980.587376  | -0.003215 | 46 | Sulfuric Acid | A543               |
| H3 | QLATfKAAR         | 885.503189  | 885.502244  | -0.000945 | 39 | Salt          | Mouse liver nuclei |
| H3 | QLATfKAAR         | 885.503189  | 885.502222  | -0.000967 | 39 | Salt          | Mouse liver nuclei |
| H3 | VTIMPfKDIQLAR     | 1411.78569  | 1411.788204 | 0.002514  | 53 | Salt          | Mouse liver nuclei |
| H3 | VTIoxMPfKDIQLAR   | 1427.780624 | 1427.776166 | -0.004458 | 24 | Sulfuric Acid | A543               |
| H3 | VTIMPfKDIQLAR     | 1411.78569  | 1411.785454 | -0.000236 | 40 | Sulfuric Acid | HeLa               |
| H3 | VTIoxMPfKDIQLAR   | 1427.780624 | 1427.780336 | -0.000288 | 55 | Sulfuric Acid | HeLa               |
| H4 | DAVTYTEHafK       | 1161.530197 | 1161.532712 | 0.002515  | 43 | Sulfuric Acid | A543               |
| H4 | DAVTYTEHafK       | 1161.530197 | 1161.530704 | 0.000507  | 30 | Sulfuric Acid | HeLa               |
| H4 | DAVTYTEHafK       | 1161.530197 | 1161.531082 | 0.000885  | 36 | Sulfuric Acid | MCF-7              |
| H4 | DAVTYTEHafKR      | 1317.631302 | 1317.631234 | -0.000068 | 98 | Sulfuric Acid | HeLa               |
| H4 | DNIQGITfKPAIR     | 1352.74118  | 1352.739448 | -0.001732 | 43 | Salt          | Mouse liver nuclei |
| H4 | DNIQGITfKPAIR     | 1352.74118  | 1352.74026  | -0.000920 | 42 | Salt          | Mouse liver nuclei |
| H4 | DNIQGITfKPAIR     | 1352.74118  | 1352.73722  | -0.003960 | 38 | Sulfuric Acid | A543               |
| H4 | DNIQGITfKPAIR     | 1352.74118  | 1352.737282 | -0.003898 | 43 | Sulfuric Acid | A543               |
| H4 | DNIQGITfKPAIR     | 1352.74118  | 1352.738586 | -0.002594 | 27 | Sulfuric Acid | HeLa               |
| H4 | DNIQGITfKPAIR     | 1352.74118  | 1352.737624 | -0.003556 | 38 | Sulfuric Acid | HeLa               |
| H4 | DNIQGITfKPAIR     | 1352.74118  | 1352.74385  | 0.002670  | 57 | Sulfuric Acid | HeLa               |
| H4 | DNIQGITfKPAIR     | 1352.74118  | 1352.737866 | -0.003314 | 27 | Sulfuric Acid | MCF-7              |
| H4 | DNIQGITfKPAIR     | 1352.74118  | 1352.737234 | -0.003946 | 51 | Sulfuric Acid | MCF-7              |
| H4 | fKTVTAMDVVYALK    | 1465.785004 | 1465.784416 | -0.000588 | 58 | Salt          | Mouse liver nuclei |
| H4 | fKTVTAMDVVYALK    | 1337.690048 | 1337.69055  | 0.000502  | 50 | Sulfuric Acid | HeLa               |
| H4 | fKTVTAMDVVYALKR   | 1621.886108 | 1621.88427  | -0.001838 | 71 | Sulfuric Acid | HeLa               |
| H4 | fKTVTAAoxMDVVYALK | 1481.779938 | 1481.779414 | -0.000524 | 70 | Sulfuric Acid | HeLa               |
| H4 | GLGfKGGaAcKR      | 912.514053  | 912.514164  | 0.000111  | 39 | Sulfuric Acid | HeLa               |
| H4 | GLGfKGGaAcKR      | 912.514053  | 912.513798  | -0.000255 | 23 | Sulfuric Acid | HeLa               |
| H4 | GLGfKGGaAcKR      | 912.514053  | 912.513356  | -0.000697 | 28 | Salt          | Mouse liver nuclei |
| H4 | GLGfKGGaAcKR      | 912.514053  | 912.51461   | 0.000557  | 19 | Sulfuric Acid | A543               |
| H4 | GVLfKVFLENVIR     | 1413.834305 | 1413.837504 | 0.003199  | 65 | Salt          | Mouse liver nuclei |
| H4 | GVLfKVFLENVIR     | 1413.834305 | 1413.837323 | 0.003018  | 65 | Salt          | Mouse liver nuclei |
| H4 | TVTAMDVVYALfKR    | 1493.791153 | 1493.793432 | 0.002279  | 61 | Salt          | Mouse liver nuclei |
| H4 | TVTAMDVVYALfKR    | 1493.791153 | 1493.791618 | 0.000465  | 61 | Sulfuric Acid | HeLa               |

|         |                   |             |             |           |    |               |                    |
|---------|-------------------|-------------|-------------|-----------|----|---------------|--------------------|
| H4      | TVTAoxMDVVYALfKR  | 1509.786087 | 1509.784806 | -0.001281 | 85 | Sulfuric Acid | HeLa               |
| HMG1    | FfKDPNAPK         | 943.476303  | 943.47598   | -0.000323 | 35 | PCA           | MCF-7              |
| HMG1    | FfKDPNAPK         | 943.476303  | 943.476012  | -0.000291 | 39 | PCA           | MCF-7              |
| HMG1    | FfKDPNAPK         | 943.476303  | 943.47713   | 0.000827  | 30 | Salt          | Mouse liver nuclei |
| HMG1    | FfKDPNAPK         | 943.476303  | 943.474934  | -0.001369 | 34 | Salt          | Mouse liver nuclei |
| HMG1    | GfKFEDoxMAK       | 968.427307  | 968.427988  | 0.000681  | 22 | PCA           | MCF-7              |
| HMG1    | GfKFEDoxMAK       | 968.427307  | 968.427988  | 0.000681  | 22 | PCA           | MCF-7              |
| HMG1    | IfKGEHPGLSIGDVAK  | 1547.830688 | 1547.829819 | -0.000869 | 39 | PCA           | MCF-7              |
| HMG1    | IfKGEHPGLSIGDVAK  | 1547.830688 | 1547.829027 | -0.001661 | 31 | Salt          | Mouse liver nuclei |
| HMG1    | YefKDIAAYR        | 1155.556    | 1155.556136 | 0.000136  | 52 | PCA           | MCF-7              |
| HMG1    | YefKDIAAYR        | 1155.556    | 1155.555534 | -0.000466 | 52 | PCA           | MCF-7              |
| HMG17   | LSAfKPAPPKPEPK    | 1386.787064 | 1386.785712 | -0.001352 | 22 | PCA           | MCF-7              |
| HMG17   | LSAfKPAPPKPEPK    | 1386.787064 | 1386.784701 | -0.002363 | 23 | PCA           | MCF-7              |
| HMGA1   | fKQPPVSPGTALVGSQK | 1620.883469 | 1620.88369  | 0.000221  | 19 | PCA           | MCF-7              |
| HMGA1   | fKQPPVSPGTALVGSQK | 1620.883469 | 1620.88459  | 0.001121  | 18 | PCA           | MCF-7              |
| Lamin 5 | LfKDLEALLNSK      | 1270.713226 | 1270.714004 | 0.000778  | 64 | Salt          | Mouse liver nuclei |
| Lamin 5 | LfKDLEALLNSK      | 1270.713226 | 1270.714277 | 0.001051  | 44 | Sulfuric Acid | HeLa               |
| Lamin 5 | LfKDLEALLNSK      | 1270.713226 | 1270.714158 | 0.000932  | 65 | Sulfuric Acid | HeLa               |
