# Supplementary material for: Nε-Formylation of lysine is a widespread post-translational modification of nuclear proteins occurring at residues involved in regulation of chromatin function
Source: PubMed Central journal article supplement — Nucleic Acids Res. 2007 Dec 1;36(2):570–7. doi: 10.1093/nar/gkm1057 (PMC2241850; doi:10.1093/nar/gkm1057), 2007-12-01
Supplement: nar_gkm1057_2.pdf [file nar_gkm1057_2.pdf]

Supplement Table S2

| Peptide         | Theoretical Mass | Measured Mass | Mass Difference | Mscot Score |
|-----------------|------------------|---------------|-----------------|-------------|
| dmKSAPATGGVK    | 942.549774       | 942.55048     | 0.000706        | 21          |
| dmKSAPATGGVK    | 942.549774       | 942.550568    | 0.000794        | 21          |
| dmKSAPATGGVK    | 942.549774       | 942.551092    | 0.001318        | 34          |
| EIAQDFdmKTDLR   | 1362.714294      | 1362.713154   | -0.00114        | 19          |
| dmKSAPATGGVK    | 942.549774       | 942.551278    | 0.001504        | 29          |
| EIAQDFdmKTDLR   | 1362.714294      | 1362.715581   | 0.001287        | 10          |
| dmKSAPATGGVK    | 942.549774       | 942.548758    | -0.001016       | 34          |
| dmKSAPATGGVK    | 942.549774       | 942.545398    | -0.004376       | 31          |
| dmKSAPATGGVK    | 942.549774       | 942.548636    | -0.001138       | 26          |
| dmKSAPATGGVK    | 942.549774       | 942.54636     | -0.003414       | 46          |
| dmKSAPATGGVK    | 942.549774       | 942.549428    | -0.000346       | 43          |
| EIAQDFdmKTDLR   | 1362.714294      | 1362.712533   | -0.001761       | 29          |
| dmKSTGGK        | 604.354385       | 604.354938    | 0.000553        | 14          |
| dmKSTGGK        | 604.354385       | 604.354704    | 0.000319        | 23          |
| dmKSAPATGGVK    | 942.549774       | 942.549454    | -0.00032        | 39          |
| EIAQDFdmKTDLR   | 1362.714294      | 1362.713844   | -0.00045        | 43          |
| dmKSTGGK        | 604.354385       | 604.354968    | 0.000583        | 27          |
| dmKSAPATGGVK    | 942.549774       | 942.547486    | -0.002288       | 49          |
| EIAQDFdmKTDLR   | 1362.677917      | 1362.677274   | -0.000643       | 52          |
| dmKSAPATGGVK    | 942.549774       | 942.548936    | -0.000838       | 44          |
| SAPATGGVdmKKPHR | 1332.762558      | 1332.76048    | -0.002078       | 42          |
| dmKSAPATGGVK    | 942.549774       | 942.548854    | -0.00092        | 54          |
| SAPATGGVdmKKPHR | 1332.762558      | 1332.760431   | -0.002127       | 24          |
| EIAQDFdmKTDLR   | 1362.714294      | 1362.712014   | -0.00228        | 25          |
| dmKSAPATGGVK    | 942.549774       | 942.548022    | -0.001752       | 60          |
| SAPATGGVdmKKPHR | 1332.762558      | 1332.760286   | -0.002272       | 58          |
| EIAQDFdmKTDLR   | 1362.714294      | 1362.711123   | -0.003171       | 23          |

—
